# Supplementary material
Source: MDPI journal article supplement (https://www.mdpi.com/2076-3417/10/4/1311)
Supplement: s1 [file s1]

# Modified Dual-Site Langmuir Adsorption Equilibrium Models from A GCMC Molecular Simulation

Junchao Wang, Yongjie Wei and Zhengfei Ma \*

State Key Laboratory of Material-Oriented Chemical Engineering, College of Chemical Engineering, Nanjing Tech University, Nanjing 210009, China; wangjunchao@njtech.edu.cn (J.W.); 15895875675@njtech.edu.cn (Y.W.)

\* Correspondence: mazf@njtech.edu.cn

Received: 16 January 2020; Accepted: 11 February 2020; Published: 14 February 2020

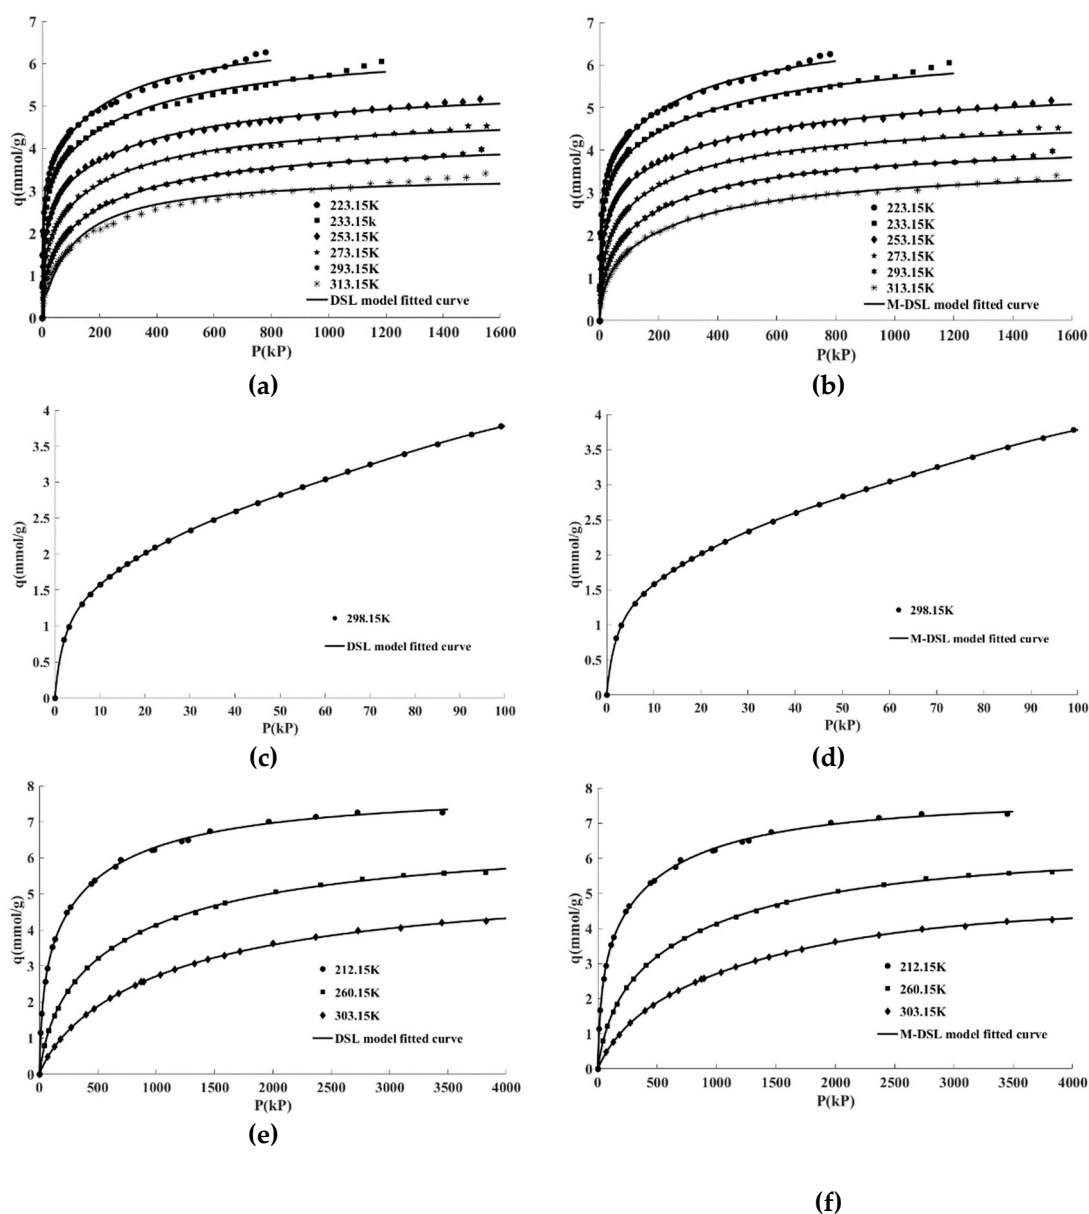

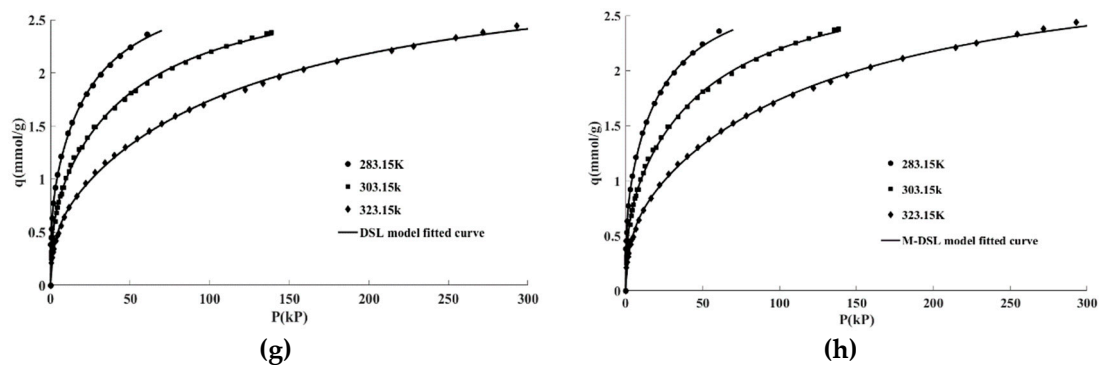

**Figure S1.** Comparison curves of the DSL model and the M-DSL model for different systems, (a) The DSL model for C<sub>2</sub>H<sub>4</sub>-HHPAC; (b) the M-DSL model for C<sub>2</sub>H<sub>4</sub>-HHPAC; (c) the DSL model for CO<sub>2</sub>-MIL-101(Cr); (d) the M-DSL model for CO<sub>2</sub>-MIL-101(Cr); (e) the DSL model for CH<sub>4</sub>-BPL; (f) the M-DSL model for CH<sub>4</sub>-BPL; (g) the DSL model for CO<sub>2</sub>-H-Mordenite; (h) the M-DSL model for CO<sub>2</sub>-H-Mordenite.

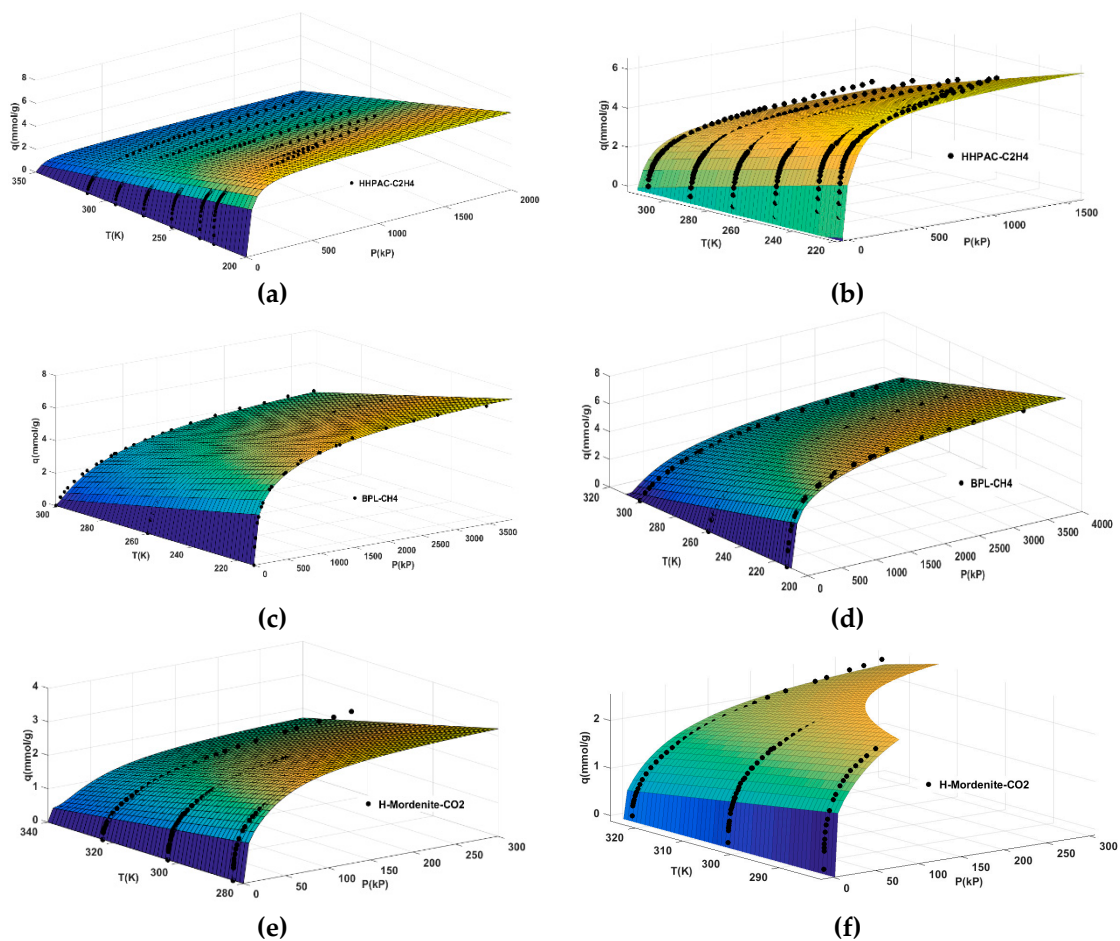

**Figure S2.** Comparison curves of the TDSL model and the M-TDSL model for different systems, (a) The TDSL model for C<sub>2</sub>H<sub>4</sub>-HHPAC; (b) the M-TDSL model for C<sub>2</sub>H<sub>4</sub>-HHPAC; (c) the TDSL model for CH<sub>4</sub>-BPL; (d) the M-TDSL model for CH<sub>4</sub>-BPL; (e) the TDSL model for CO<sub>2</sub>-H-Mordenite; (f) the M-TDSL model for CO<sub>2</sub>-H-Mordenite.
